# Supplementary material
Source: publisher figshare collection journal article supplement (https://frontiersin.figshare.com/ndownloader/files/30478284)
Supplement: Supplementary file [file 30478284]

Supplementary figure 1

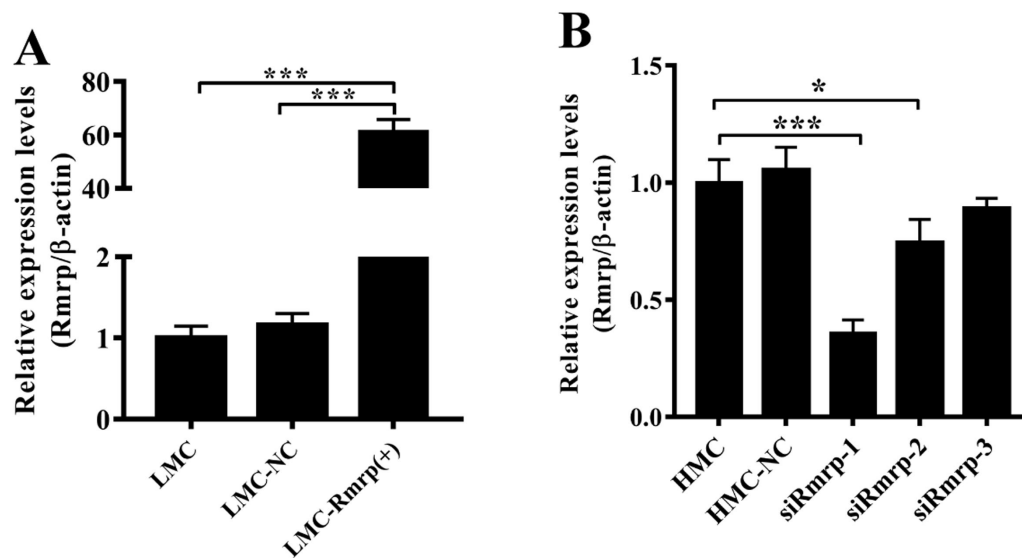

Supplementary figure 1. The expression levels of Rmp were detected by qRT-PCR after transfection with Rmp over-expression in L-MC (**A**) or Rmp small interfering RNA (siRNA) in H-MC (**B**). Data were represented as the mean  $\pm$  SD of three independent experiments; \* $p < 0.05$  and \*\*\* $p < 0.001$ .

Supplementary figure 2

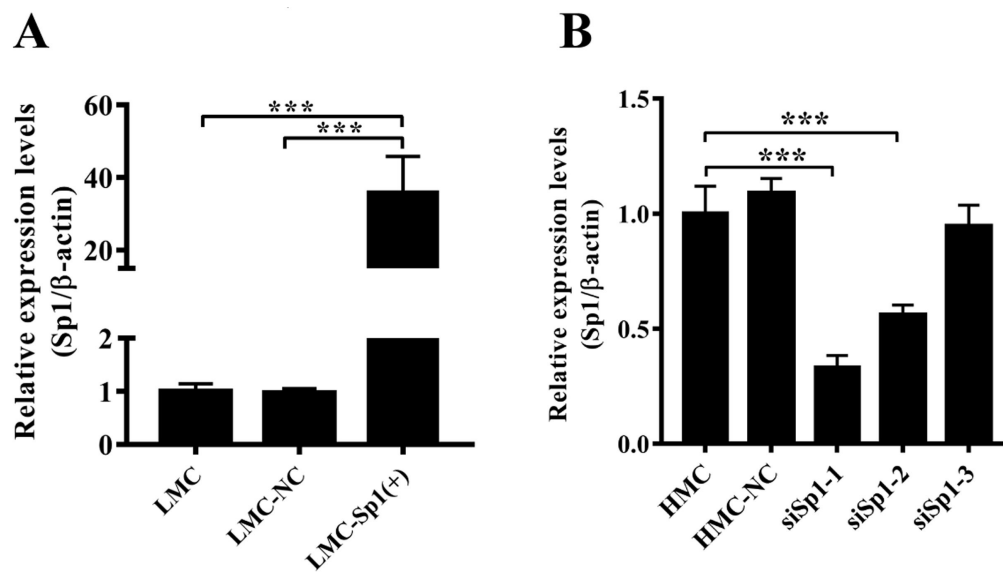

Supplementary figure 2. The expression levels of Sp1 were detected by qRT-PCR after transfection with Sp1 over-expression in L-MC (A) or Sp1 siRNA in H-MC (B). Data were represented as the mean  $\pm$  SD of three independent experiments; \*\*\* $p < 0.001$ .

Supplementary figure 3

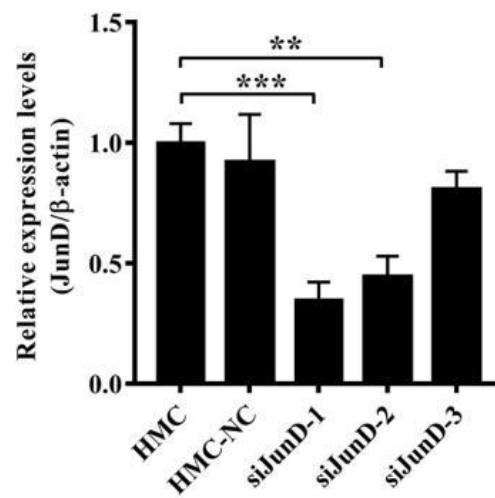

Supplementary figure 3. The expression levels of JunD were detected by qRT-PCR after transfection with Sp1 siRNA in H-MC. Data were represented as the mean  $\pm$  SD of three independent experiments; \*\* $p < 0.05$  and \*\*\* $p < 0.001$ .
